# Supplementary figures and images for: Regulation of mammalian Gli proteins by Costal 2 and PKA in Drosophila reveals Hedgehog pathway conservation
Source: Oxford University Press journal article supplement (doi:10.1242/dev.063479), 2011-05-24

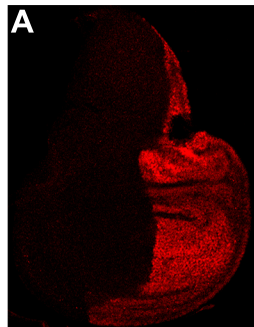

UAS  
Ci

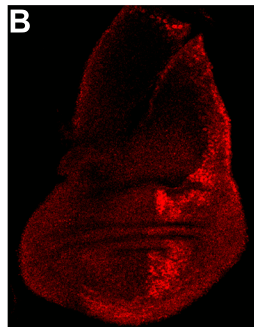

*hh-lacZ*

UAS  
Gli3

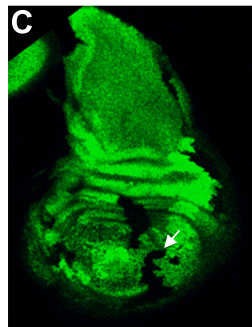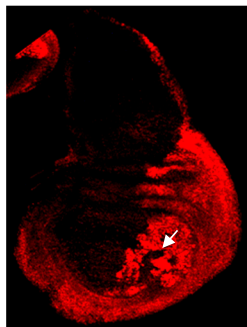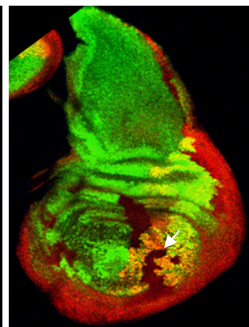

UAS  
Ci

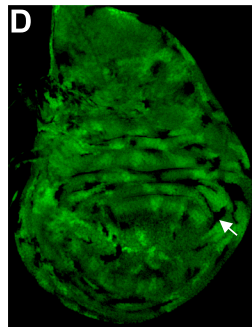

GFP

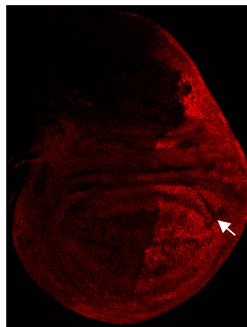

*hh-lacZ*

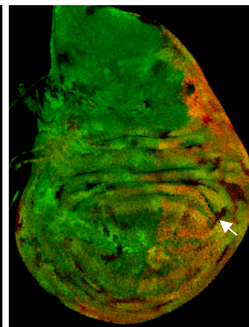

UAS  
Gli3

merge

*smo* clones

Supplement: dev063479figs1.pdf [file dev063479figs1.pdf]

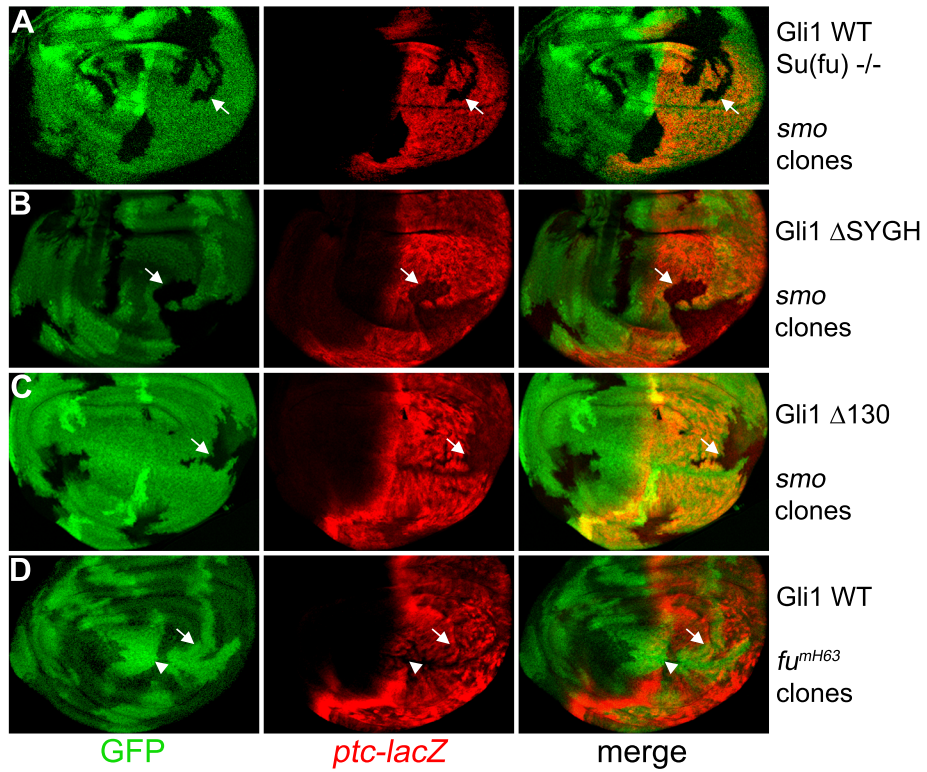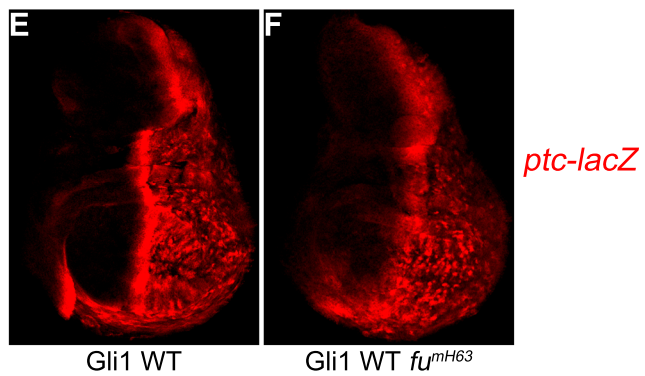

Supplement: dev063479figs2.pdf [file dev063479figs2.pdf]

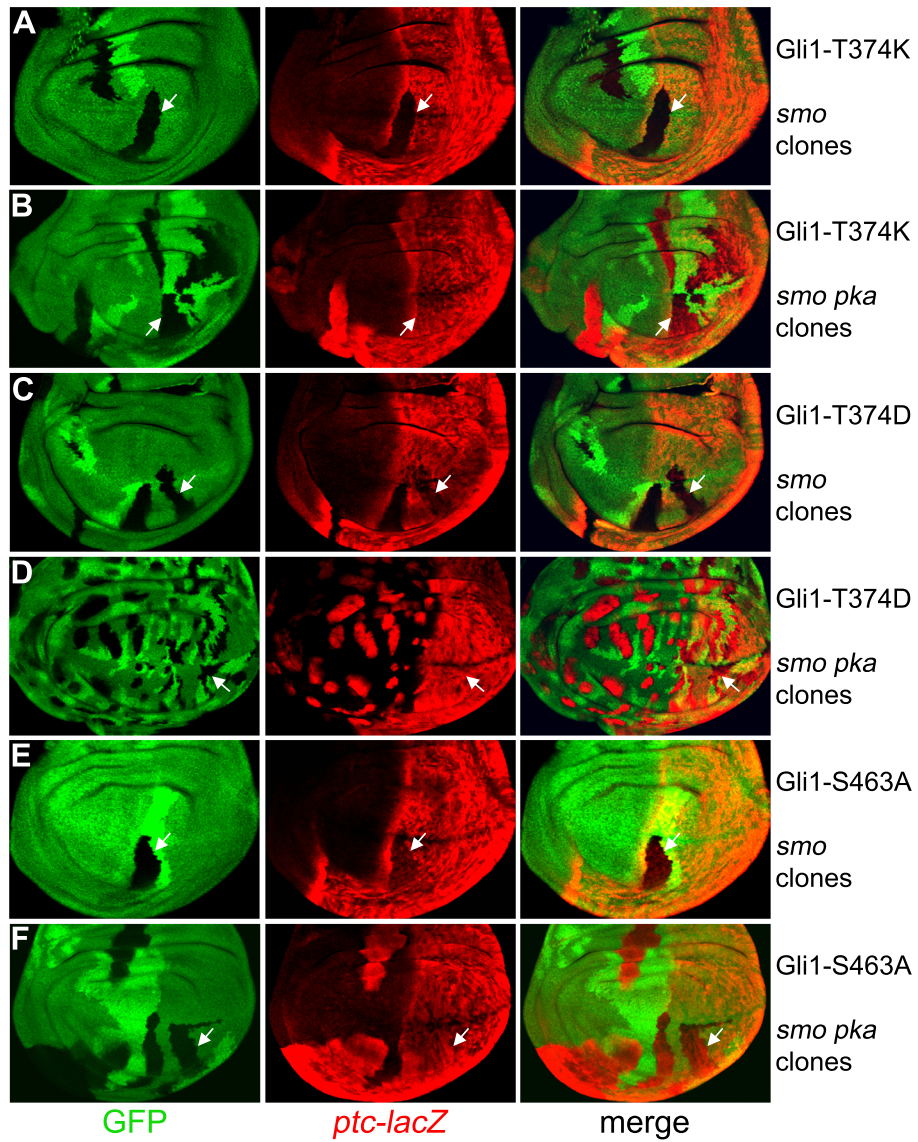

Supplement: dev063479figs3.pdf [file dev063479figs3.pdf]

Ci-S849A

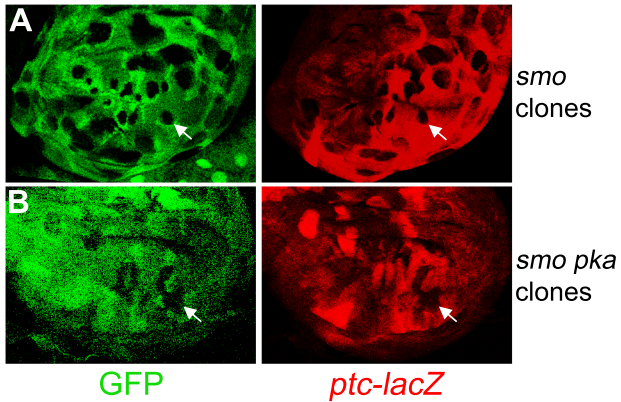

Supplement: dev063479figs4.pdf [file dev063479figs4.pdf]
